# Supplementary material
Source: PubMed Central journal article supplement (PMC8160932)

## Supplementary Online Content

Parravano M, Petri D, Maurutto E, et al. Association between visual impairment and depression in patients attending eye clinics: a meta-analysis. *JAMA Ophthalmol*. Published online May 27, 2021.  
doi:10.1001/jamaophthalmol.2021.1557

**eMethods.** Full Search Strategy

**eAppendix.** Risk of Bias Assessment of Each Study

**eFigure 1.** Forest Plot of Prevalence of Depression According to Age

**eFigure 2.** Forest Plot of Prevalence of Depression According to Severity of Vision Impairment

**eFigure 3.** Forest Plot of Prevalence of Depression According to Exclusions of Other Comorbidities

**eFigure 4.** Forest Plot of Prevalence of Depression According to Sample Size

**eFigure 5.** Forest Plot of Overall Prevalence of Depression According to Setting

**eFigure 6.** Forest Plot of Overall Prevalence of Depression According to Depression Diagnostic Tool

This supplementary material has been provided by the authors to give readers additional information about their work.

## eMethods. Full Search Strategy

### PUBMED

("Depressive Disorder"[Mesh] OR "Depressive Disorder, Treatment-Resistant"[Mesh] OR "Bipolar Disorder" [Mesh] OR "Adjustment Disorders"[Mesh] OR "Affective Disorders, Psychotic"[Mesh] OR depress\*[TIAB] OR ((bipolar[TIAB] OR affective[TIAB] OR adjust\*) AND disorder\*[TIAB])) )

AND

("Vision, Low"[Mesh] OR ((VISUAL[TIAB] OR vision[TIAB] OR ocular[TIAB] OR eye\*[TIAB]) AND (IMPAIRMENT[TIAB] OR low[TIAB])))

### EMBASE

('low vision'/exp OR ((visual:ab,ti OR vision:ab,ti OR ocular:ab,ti OR eye\*:ab,ti) AND (impairment:ab,ti OR low\*:ab,ti))) AND ('depression'/exp OR 'treatment resistant depression'/exp OR 'bipolar disorder'/exp OR 'adjustment disorder'/exp OR 'affective psychosis'/exp OR depress\*:ab,ti OR ((bipolar:ab,ti OR affective:ab,ti OR adjust\*:ab,ti) AND disorder\*:ab,ti))

AND

('article'/it OR 'article in press'/it OR 'note'/it OR 'review'/it OR 'short survey'/it)

AND

[english]/lim

## Details and operationalization of the risk of bias assessment

A maximum of 10 stars was assigned in five domains (max 2 for each domain).

### Lack of generalizability bias

We assessed the lack of generalizability bias based on two criteria: sampling consistent with our study objectives (adults treated in clinical or rehabilitation services) and an available definition of visual loss used as criterion to be diagnosed as having low vision.

We decided to assign 2 stars to studies that reported the inclusion of such patients and did not exclude patients with co-morbidities. If study participants were selected against strict and selective inclusion criteria, the study was considered to be affected by lack of generalizability bias and, consequently, assigned 1 or no stars.

We decided *a priori* to downgrade randomized controlled trials for lack of generalizability.

### Record bias

We assigned two stars to prospective studies and one star to retrospective and registry-based studies.

### Attrition bias

This assessment differed according to study design and considered the proportion and the characteristics of patients excluded or eligible but not included. We considered that the failure to include more than 10% of eligible patients was of concern, as was the fact that risk factors for depression, such as comorbidities, were more prevalent in patients who were lost.

### Detection bias

For cross-sectional studies we assigned 2 stars to studies using the same diagnostic modality for all subjects and regardless of vision status. We downgraded 1 star if a masked assessment with respect to vision status was not used or was unclear.

### Reporting bias

Our assessment of reporting bias focused on the pre-specification of methods used to diagnose depression and analyses methods. We assigned 2 stars to studies reporting analyses for all pre-specified diagnostic tools, including psychiatric examination or validated questionnaires, for which a protocol was available.

We assigned 1 star to registry-based studies or studies reporting only a subset of pre-specified diagnostic tools. No stars were assigned to studies reporting only the number of patients who were affected by depression with no details on the planned diagnostic process.

## eAppendix. Risk of Bias Assessment of Each Study

**Study:** Choi, 2019

**Design:** cross-sectional clinic-based

| Domain                               | N. stars | Explanation                                                                                                                                                                             |
|--------------------------------------|----------|-----------------------------------------------------------------------------------------------------------------------------------------------------------------------------------------|
| <b>Lack of generalizability bias</b> | **       | Unclear if consecutive subjects, but probably so.<br>Acceptable exclusions: cognitive impairment and previous psychiatric diagnoses.<br>ICD 10 <sup>th</sup> revision definition of VI. |
| <b>Record bias</b>                   | **       | Prospective study                                                                                                                                                                       |
| <b>Attrition bias</b>                | **       | No losses reported                                                                                                                                                                      |
| <b>Detection bias</b>                | *        | Patient-only study, but no information on masking with respect to vision status                                                                                                         |
| <b>Reporting bias</b>                | **       | BDI used only                                                                                                                                                                           |
| <b>Total score</b>                   | <b>9</b> |                                                                                                                                                                                         |

**Study:** Crewe, 2011

**Design:** cross-sectional clinic-based

| Domain                               | N. stars | Explanation                                                                                                                                               |
|--------------------------------------|----------|-----------------------------------------------------------------------------------------------------------------------------------------------------------|
| <b>Lack of generalizability bias</b> | *        | Randomly selected from register of VI.<br>Acceptable exclusions: cognitive or neurological impairment.<br>Definition of VI >0.6 logMar or <10° VF or both |
| <b>Record bias</b>                   | **       | Prospective study                                                                                                                                         |
| <b>Attrition bias</b>                | *        | >10% not included                                                                                                                                         |
| <b>Detection bias</b>                | **       | Patient-only study                                                                                                                                        |
| <b>Reporting bias</b>                | 0        | Depression only self report                                                                                                                               |
| <b>Total score</b>                   | <b>6</b> |                                                                                                                                                           |

**Study:** Girdler, 2010

**Design:** cross-sectional clinic-based

| Domain                               | N. stars | Explanation                                                                                                                                                                     |
|--------------------------------------|----------|---------------------------------------------------------------------------------------------------------------------------------------------------------------------------------|
| <b>Lack of generalizability bias</b> | *        | Randomized controlled trial.<br>Acceptable exclusions: not sufficient physical stamina, mental functioning, hearing and communication ability.<br>Only patients ≤ 6/12 included |

|                       |          |                                                                             |
|-----------------------|----------|-----------------------------------------------------------------------------|
| <b>Record bias</b>    | **       | Prospective study                                                           |
| <b>Attrition bias</b> | 0        | % enrolled patients not specified                                           |
| <b>Detection bias</b> | *        | Patient-only study, no information on masking with respect to vision status |
| <b>Reporting bias</b> | **       | GDS used only                                                               |
| <b>Total score</b>    | <b>6</b> |                                                                             |

**Study:** Goldstein, 2012

**Design:** cross-sectional clinic-based

| <b>Domain</b>                        | <b>N. stars</b> | <b>Explanation</b>                                                                                                                                                                                                                   |
|--------------------------------------|-----------------|--------------------------------------------------------------------------------------------------------------------------------------------------------------------------------------------------------------------------------------|
| <b>Lack of generalizability bias</b> | *               | Unclear if consecutive subjects, but probably so.<br><br>Acceptable exclusions: patients unable to communicate in English by telephone.<br><br>No visual impairment definition, but patients scheduled to attend low-vision services |
| <b>Record bias</b>                   | **              | Prospective study                                                                                                                                                                                                                    |
| <b>Attrition bias</b>                | *               | >10% not included                                                                                                                                                                                                                    |
| <b>Detection bias</b>                | *               | Patient-only study, no information on masking with respect to vision status                                                                                                                                                          |
| <b>Reporting bias</b>                | **              | GDS used only                                                                                                                                                                                                                        |
| <b>Total score</b>                   | <b>7</b>        |                                                                                                                                                                                                                                      |

**Study:** Goldstein, 2014

**Design:** cross-sectional clinic-based

| <b>Domain</b>                        | <b>N. stars</b> | <b>Explanation</b>                                                                                                                                                                                                                                          |
|--------------------------------------|-----------------|-------------------------------------------------------------------------------------------------------------------------------------------------------------------------------------------------------------------------------------------------------------|
| <b>Lack of generalizability bias</b> | *               | Unclear if consecutive patients, but probably so.<br><br>Acceptable exclusions: patients unable to communicate by telephone.<br><br>No visual impairment definition or other eligibility requirements, but patients scheduled to attend low-vision services |
| <b>Record bias</b>                   | **              | Prospective study                                                                                                                                                                                                                                           |
| <b>Attrition bias</b>                | **              | No losses reported                                                                                                                                                                                                                                          |
| <b>Detection bias</b>                | *               | Patient-only study, no information on masking with respect to vision status                                                                                                                                                                                 |
| <b>Reporting bias</b>                | **              | GDS used only                                                                                                                                                                                                                                               |
| <b>Total score</b>                   | <b>8</b>        |                                                                                                                                                                                                                                                             |

**Study:** Haymar, 2007

**Design:** cross-sectional clinic-based

| <b>Domain</b>                        | <b>N. stars</b> | <b>Explanation</b>                                                                                                                                                                                                         |
|--------------------------------------|-----------------|----------------------------------------------------------------------------------------------------------------------------------------------------------------------------------------------------------------------------|
| <b>Lack of generalizability bias</b> | *               | Unclear if consecutive subjects, but probably so. Data collected at enrolment for a falls prevention trial.<br><br>VI defined moderate logMAR 0.6-0.9; severe 0.91-1.3; profound 1.31-1.7; near total blindness $\geq 1.7$ |
| <b>Record bias</b>                   | **              | Prospective study                                                                                                                                                                                                          |
| <b>Attrition bias</b>                | *               | >10% not included                                                                                                                                                                                                          |
| <b>Detection bias</b>                | *               | Patient-only study, no information on masking with respect to vision status                                                                                                                                                |
| <b>Reporting bias</b>                | **              | GDS used only                                                                                                                                                                                                              |
| <b>Total score</b>                   | <b>7</b>        |                                                                                                                                                                                                                            |

**Study:** Holloway, 2014

**Design:** cross-sectional clinic-based

| <b>Domain</b>                        | <b>N. stars</b> | <b>Explanation</b>                                                                                                                                                                                                                                                   |
|--------------------------------------|-----------------|----------------------------------------------------------------------------------------------------------------------------------------------------------------------------------------------------------------------------------------------------------------------|
| <b>Lack of generalizability bias</b> | **              | Unclear if consecutive subjects, but probably so.<br><br>Acceptable exclusions: no adequate hearing, cognitive impairment. 50 subjects had a history of depression.<br><br>Visual impairment categorized as mild (<6/12–6/18), moderate (<6/18–6/60), severe (<6/60) |
| <b>Record bias</b>                   | **              | Prospective study                                                                                                                                                                                                                                                    |
| <b>Attrition bias</b>                | *               | 16% screened subjects declined to take part to the study                                                                                                                                                                                                             |
| <b>Detection bias</b>                | *               | Patient-only study, no information on masking with respect to vision status                                                                                                                                                                                          |
| <b>Reporting bias</b>                | **              | PHQ-2 used only                                                                                                                                                                                                                                                      |
| <b>Total score</b>                   | <b>8</b>        |                                                                                                                                                                                                                                                                      |

**Study:** Horowitz a, 2005

**Design:** cross-sectional clinic-based

| <b>Domain</b>                        | <b>N. stars</b> | <b>Explanation</b>                                                                                                                                  |
|--------------------------------------|-----------------|-----------------------------------------------------------------------------------------------------------------------------------------------------|
| <b>Lack of generalizability bias</b> | *               | Unclear if consecutive subjects, but probably so.<br><br>Acceptable exclusions: not sufficient hearing and cognition, Parkinson, history of stroke- |

|                       |          |                                                                                       |
|-----------------------|----------|---------------------------------------------------------------------------------------|
|                       |          | No visual impairment definition, but patients scheduled to attend low-vision services |
| <b>Record bias</b>    | **       | Prospective study                                                                     |
| <b>Attrition bias</b> | *        | >10% not included                                                                     |
| <b>Detection bias</b> | *        | Patient-only study, no information on masking with respect to vision status           |
| <b>Reporting bias</b> | **       | DSM-IV criteria and CESDS combined                                                    |
| <b>Total score</b>    | <b>7</b> |                                                                                       |

**Study:** Horowitz b, 2005

**Design:** cross-sectional clinic-based

| <b>Domain</b>                        | <b>N. stars</b> | <b>Explanation</b>                                                                                                                         |
|--------------------------------------|-----------------|--------------------------------------------------------------------------------------------------------------------------------------------|
| <b>Lack of generalizability bias</b> | *               | Unclear if consecutive subjects, but probably so.<br>No visual impairment definition, but patients scheduled to attend low-vision services |
| <b>Record bias</b>                   | **              | Prospective study                                                                                                                          |
| <b>Attrition bias</b>                | 0               | % enrolled patients not specified                                                                                                          |
| <b>Detection bias</b>                | *               | Patient-only study, no information on masking with respect to vision status                                                                |
| <b>Reporting bias</b>                | **              | CESDS used only                                                                                                                            |
| <b>Total score</b>                   | <b>6</b>        |                                                                                                                                            |

**Study:** Ip, 2000

**Design:** cross-sectional clinic-based

| <b>Domain</b>                        | <b>N. stars</b> | <b>Explanation</b>                                                          |
|--------------------------------------|-----------------|-----------------------------------------------------------------------------|
| <b>Lack of generalizability bias</b> | **              | All residents in a nursing home for older persons with IV.<br>VI < 20/400   |
| <b>Record bias</b>                   | **              | Prospective study                                                           |
| <b>Attrition bias</b>                | **              | No patients excluded                                                        |
| <b>Detection bias</b>                | *               | Patient-only study, no information on masking with respect to vision status |
| <b>Reporting bias</b>                | **              | GDS used only                                                               |
| <b>Total score</b>                   | <b>9</b>        |                                                                             |

**Study:** Kemper, 2014

**Design:** cross-sectional clinic-based

| Domain                               | N. stars | Explanation                                                                                                                                                                                                                                                                      |
|--------------------------------------|----------|----------------------------------------------------------------------------------------------------------------------------------------------------------------------------------------------------------------------------------------------------------------------------------|
| <b>Lack of generalizability bias</b> | *        | Cohort study, study group recruited as part of a randomized controlled trial.<br><br>Acceptable exclusions: cognitive impairment, language or hearing problems, confinement in bed.<br><br>No visual impairment definition, but patients scheduled to attend low-vision services |
| <b>Record bias</b>                   | **       | Prospective study                                                                                                                                                                                                                                                                |
| <b>Attrition bias</b>                | 0        | % enrolled patients not specified                                                                                                                                                                                                                                                |
| <b>Detection bias</b>                | *        | Patient-only study, no information on masking with respect to vision status                                                                                                                                                                                                      |
| <b>Reporting bias</b>                | **       | HADS used only                                                                                                                                                                                                                                                                   |
| <b>Total score</b>                   | <b>6</b> |                                                                                                                                                                                                                                                                                  |

**Study:** Nollet, 2019

**Design:** cross-sectional clinic-based

| Domain                               | N. stars | Explanation                                                                                                                                                                                                                                                              |
|--------------------------------------|----------|--------------------------------------------------------------------------------------------------------------------------------------------------------------------------------------------------------------------------------------------------------------------------|
| <b>Lack of generalizability bias</b> | *        | Consecutive patients.<br><br>Acceptable exclusions: patient too ill, dementia, recently bereaved.<br><br>No visual impairment definition or other eligibility requirements, but patients seeking help for vision impairment at specialist visual rehabilitation services |
| <b>Record bias</b>                   | **       | Prospective study                                                                                                                                                                                                                                                        |
| <b>Attrition bias</b>                | *        | >10% not included                                                                                                                                                                                                                                                        |
| <b>Detection bias</b>                | *        | Patient-only study, no information on masking with respect to vision status                                                                                                                                                                                              |
| <b>Reporting bias</b>                | **       | GDS-15 used only                                                                                                                                                                                                                                                         |
| <b>Total score</b>                   | <b>7</b> |                                                                                                                                                                                                                                                                          |

**Study:** Noran, 2008

**Design:** cross-sectional clinic-based

| Domain                               | N. stars | Explanation                                                                                                                                      |
|--------------------------------------|----------|--------------------------------------------------------------------------------------------------------------------------------------------------|
| <b>Lack of generalizability bias</b> | *        | Patient attending the eye clinic in random sample days.<br>Acceptable exclusion: patients unable to communicate.<br><br>>=3/60 VI<6/18 or VF<20° |

|                       |          |                                                         |
|-----------------------|----------|---------------------------------------------------------|
| <b>Record bias</b>    | **       | Prospective study                                       |
| <b>Attrition bias</b> | **       | Cross-sectional data, no losses reported                |
| <b>Detection bias</b> | *        | No information on masking with respect to vision status |
| <b>Reporting bias</b> | **       | GDS-15 used only                                        |
| <b>Total score</b>    | <b>8</b> |                                                         |

**Study:** Oswley, 2004

**Design:** cross-sectional clinic-based

| <b>Domain</b>                        | <b>N. stars</b> | <b>Explanation</b>                                                                                                                                                                                                    |
|--------------------------------------|-----------------|-----------------------------------------------------------------------------------------------------------------------------------------------------------------------------------------------------------------------|
| <b>Lack of generalizability bias</b> | *               | Recruitment population: licensed drivers 60 years and older who had a crash in the year before.<br><br>Acceptable exclusions: cognitive impairment.<br><br>VI defined as VA 20/30-20/60, useful VF impairment or both |
| <b>Record bias</b>                   | **              | Prospective study                                                                                                                                                                                                     |
| <b>Attrition bias</b>                | *               | >10% not included                                                                                                                                                                                                     |
| <b>Detection bias</b>                | *               | Patient-only study, no information on masking with respect to vision status                                                                                                                                           |
| <b>Reporting bias</b>                | **              | CESDS used only                                                                                                                                                                                                       |
| <b>Total score</b>                   | <b>7</b>        |                                                                                                                                                                                                                       |

**Study:** Rees, 2010

**Design:** cross-sectional clinic-based

| <b>Domain</b>                        | <b>N. stars</b> | <b>Explanation</b>                                                                                                                                |
|--------------------------------------|-----------------|---------------------------------------------------------------------------------------------------------------------------------------------------|
| <b>Lack of generalizability bias</b> | **              | Unclear if consecutive subjects, but probably so. Acceptable exclusions: cognitive impairment and previous psychiatric diagnoses.<br><br>VI <6/12 |
| <b>Record bias</b>                   | **              | Prospective study                                                                                                                                 |
| <b>Attrition bias</b>                | **              | No losses reported                                                                                                                                |
| <b>Detection bias</b>                | *               | Patient-only study, no information on masking with respect to vision status                                                                       |
| <b>Reporting bias</b>                | **              | PHQ-9 used only                                                                                                                                   |
| <b>Total score</b>                   | <b>9</b>        |                                                                                                                                                   |



**Study:** Rees, 2019

**Design:** cross-sectional clinic-based

| Domain                        | N. stars | Explanation                                                                                                                  |
|-------------------------------|----------|------------------------------------------------------------------------------------------------------------------------------|
| Lack of generalizability bias | *        | Baseline data from a randomized controlled trial.<br>Acceptable exclusions: cognitive impairment.<br>VI <6/12 and/or near VI |
| Record bias                   | **       | Prospective study                                                                                                            |
| Attrition bias                | *        | >10% not included                                                                                                            |
| Detection bias                | *        | Patient-only study, no information on masking with respect to vision status                                                  |
| Reporting bias                | **       | CSDD used only                                                                                                               |
| <b>Total score</b>            | <b>7</b> |                                                                                                                              |

**Study:** Renieri, 2013

**Design:** cross-sectional clinic-based

| Domain                        | N. stars | Explanation                                                                                                                                                                               |
|-------------------------------|----------|-------------------------------------------------------------------------------------------------------------------------------------------------------------------------------------------|
| Lack of generalizability bias | *        | Interventional clinic study enrolling consecutive patients scheduled for low vision service<br><br>No visual impairment definition, but patients scheduled to attend low-vision services. |
| Record bias                   | **       | Prospective study                                                                                                                                                                         |
| Attrition bias                | *        | Cross-sectional use of data, but losses >10%                                                                                                                                              |
| Detection bias                | *        | Patient-only study, no information on masking with respect to vision status                                                                                                               |
| Reporting bias                | **       | HADS used only                                                                                                                                                                            |
| <b>Total score</b>            | <b>7</b> |                                                                                                                                                                                           |

**Study:** Robertson, 2006

**Design:** longitudinal study, cross-sectional use of data

| Domain                        | N. stars | Explanation                                                                                                                                                                                                                                           |
|-------------------------------|----------|-------------------------------------------------------------------------------------------------------------------------------------------------------------------------------------------------------------------------------------------------------|
| Lack of generalizability bias | *        | Unclear if consecutive subjects, but probably so.<br><br>Acceptable exclusions: second chronic illness in the preceding 12 months, cognitive dysfunction.<br><br>No visual impairment definition, but patients registered in a society for the blind. |
| Record bias                   | **       | Prospective study                                                                                                                                                                                                                                     |
| Attrition bias                | *        | Response rate 25%                                                                                                                                                                                                                                     |

|                       |    |                                                                             |
|-----------------------|----|-----------------------------------------------------------------------------|
| <b>Detection bias</b> | *  | Patient-only study, no information on masking with respect to vision status |
| <b>Reporting bias</b> | ** | HADS used only                                                              |
| <b>Total score</b>    | 7  |                                                                             |

**Study:** Shmueli-Dulitzki, 1995

**Design:** cross-sectional clinic-based

| <b>Domain</b>                        | <b>N. stars</b> | <b>Explanation</b>                                                                                                             |
|--------------------------------------|-----------------|--------------------------------------------------------------------------------------------------------------------------------|
| <b>Lack of generalizability bias</b> | *               | Unclear if consecutive subjects, but probably so.<br>No visual impairment definition, but patients attending low vision clinic |
| <b>Record bias</b>                   | **              | Prospective study                                                                                                              |
| <b>Attrition bias</b>                | **              | No losses reported                                                                                                             |
| <b>Detection bias</b>                | *               | Patient-only study, no information on masking with respect to vision status                                                    |
| <b>Reporting bias</b>                | **              | DSM-III checklist for depression used only                                                                                     |
| <b>Total score</b>                   | 8               |                                                                                                                                |

**Study:** Sturrock, 2014

**Design:** cross-sectional clinic-based

| <b>Domain</b>                        | <b>N. stars</b> | <b>Explanation</b>                                                                                                                   |
|--------------------------------------|-----------------|--------------------------------------------------------------------------------------------------------------------------------------|
| <b>Lack of generalizability bias</b> | **              | Unclear if consecutive subjects, but probably so.<br>Acceptable exclusions: cognitive impairment, not adequate hearing.<br>VI < 6/12 |
| <b>Record bias</b>                   | **              | Prospective study                                                                                                                    |
| <b>Attrition bias</b>                | **              | No losses reported                                                                                                                   |
| <b>Detection bias</b>                | *               | Patient-only study, no information on masking with respect to vision status                                                          |
| <b>Reporting bias</b>                | **              | PHQ-9 used only                                                                                                                      |
| <b>Total score</b>                   | 9               |                                                                                                                                      |

**Study:** Van der Aa, 2014

**Design:** cross-sectional clinic-based

| <b>Domain</b>                        | <b>N. stars</b> | <b>Explanation</b>                                                                         |
|--------------------------------------|-----------------|--------------------------------------------------------------------------------------------|
| <b>Lack of generalizability bias</b> | *               | Unclear if consecutive subjects, but probably so. Data from a randomized controlled trial. |

|                       |    |                                                                                           |
|-----------------------|----|-------------------------------------------------------------------------------------------|
|                       |    | Acceptable exclusions: no severe cognitive impairment.<br>VI $\leq$ 0.3 and/or VF $<$ 30° |
| <b>Record bias</b>    | ** | Prospective study                                                                         |
| <b>Attrition bias</b> | *  | 30.5% response rate                                                                       |
| <b>Detection bias</b> | *  | Patient-only study, no information on masking with respect to vision status               |
| <b>Reporting bias</b> | ** | MINI used for depression diagnosis, CESDS for subthreshold depression.                    |
| <b>Total score</b>    | 7  |                                                                                           |

**eFigure 1.** Forest Plot of Prevalence of Depression According to Age (less than 75 years vs. 75 years or more)

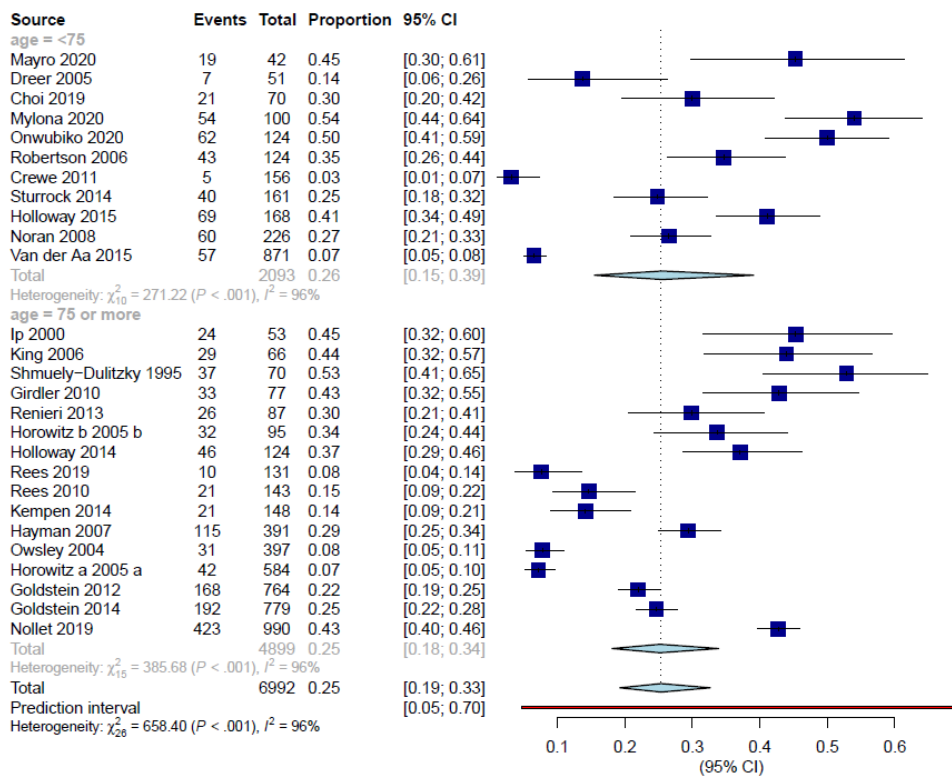

**eFigure 2.** Forest Plot of Prevalence of Depression According to Severity of Vision Impairment (mild, moderate, severe – see Methods)

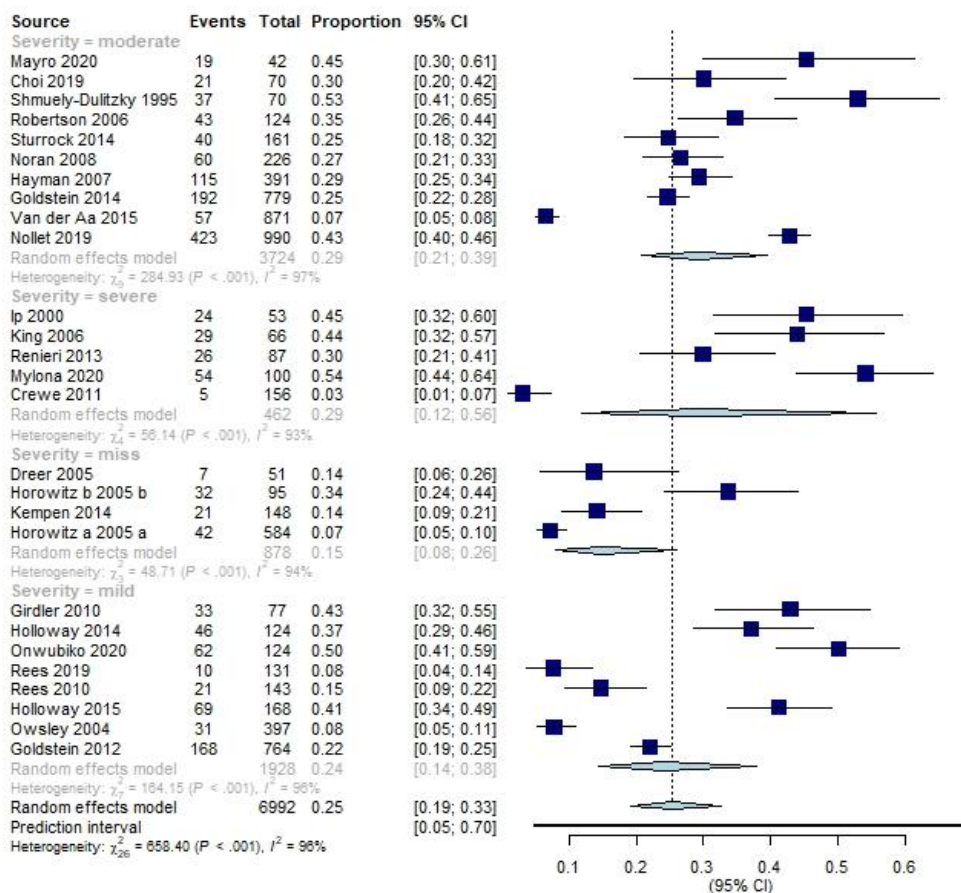

**eFigure 3.** Forest Plot of Prevalence of Depression According to Exclusions of Other Comorbidities (vs. no exclusion)

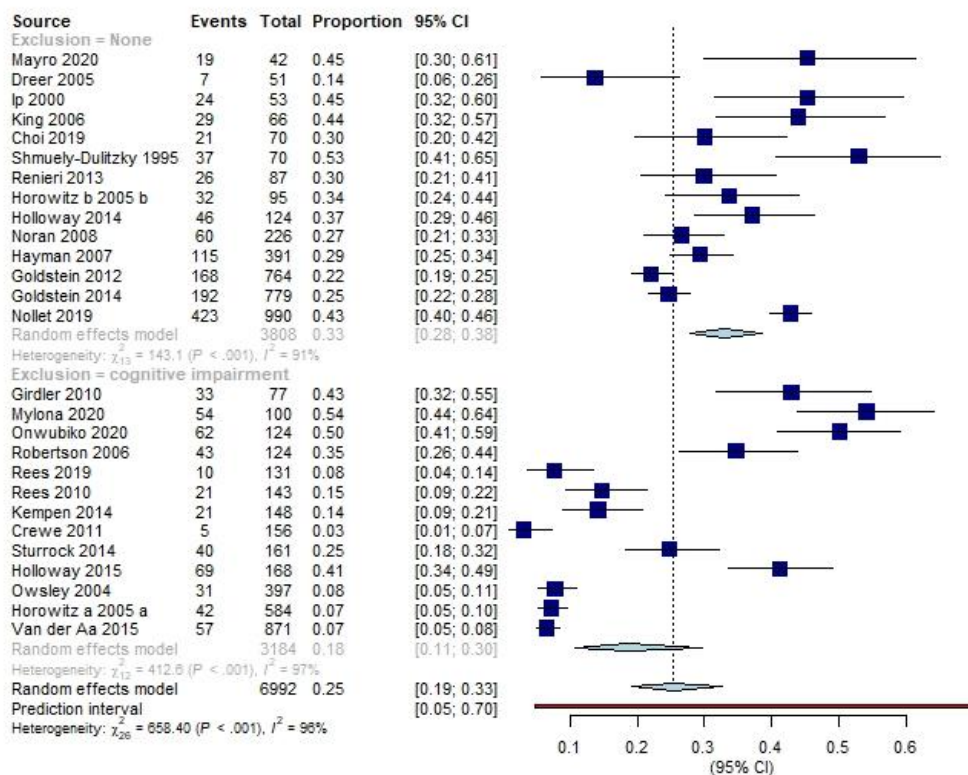

**eFigure 4.** Forest Plot of Prevalence of Depression According to Sample Size (smaller vs. larger than median 125 patients)

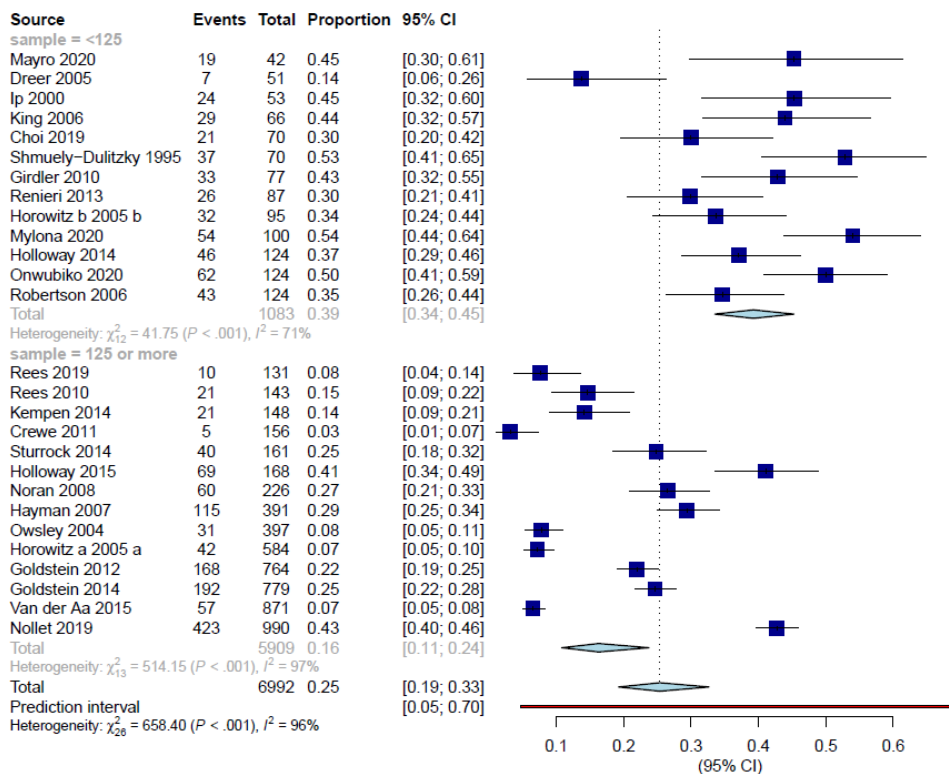

**eFigure 5.** Forest Plot of Overall Prevalence of Depression According to Setting

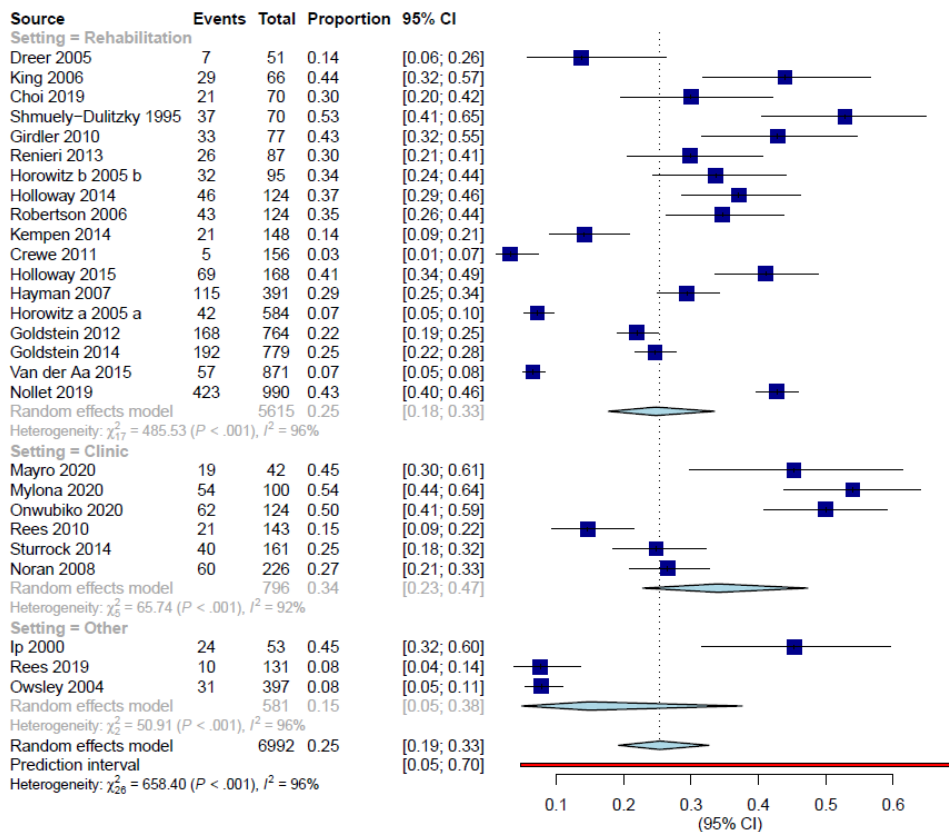



**eFigure 6.** Forest Plot of Overall Prevalence of Depression According to Depression Diagnostic Tool

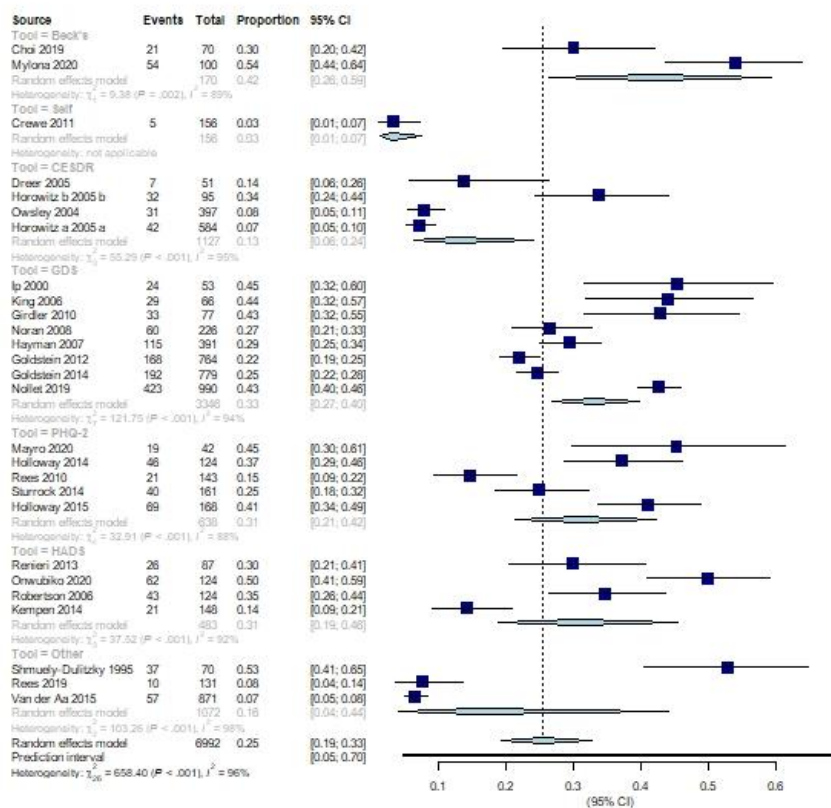

Supplement: jamaophthalmol-e211557-s001.pdf [file jamaophthalmol-e211557-s001.pdf]
